# Supplementary material for: Molecular diagnosis of scabies using a novel probe-based polymerase chain reaction assay targeting high-copy number repetitive sequences in the Sarcoptes scabiei genome
Source: PubMed Central journal article supplement (PMC7939366; doi:10.1371/journal.pntd.0009149), 2021-02-24
Supplement: pntd.0009149.s002.pdf [file pntd.0009149.s002.pdf]

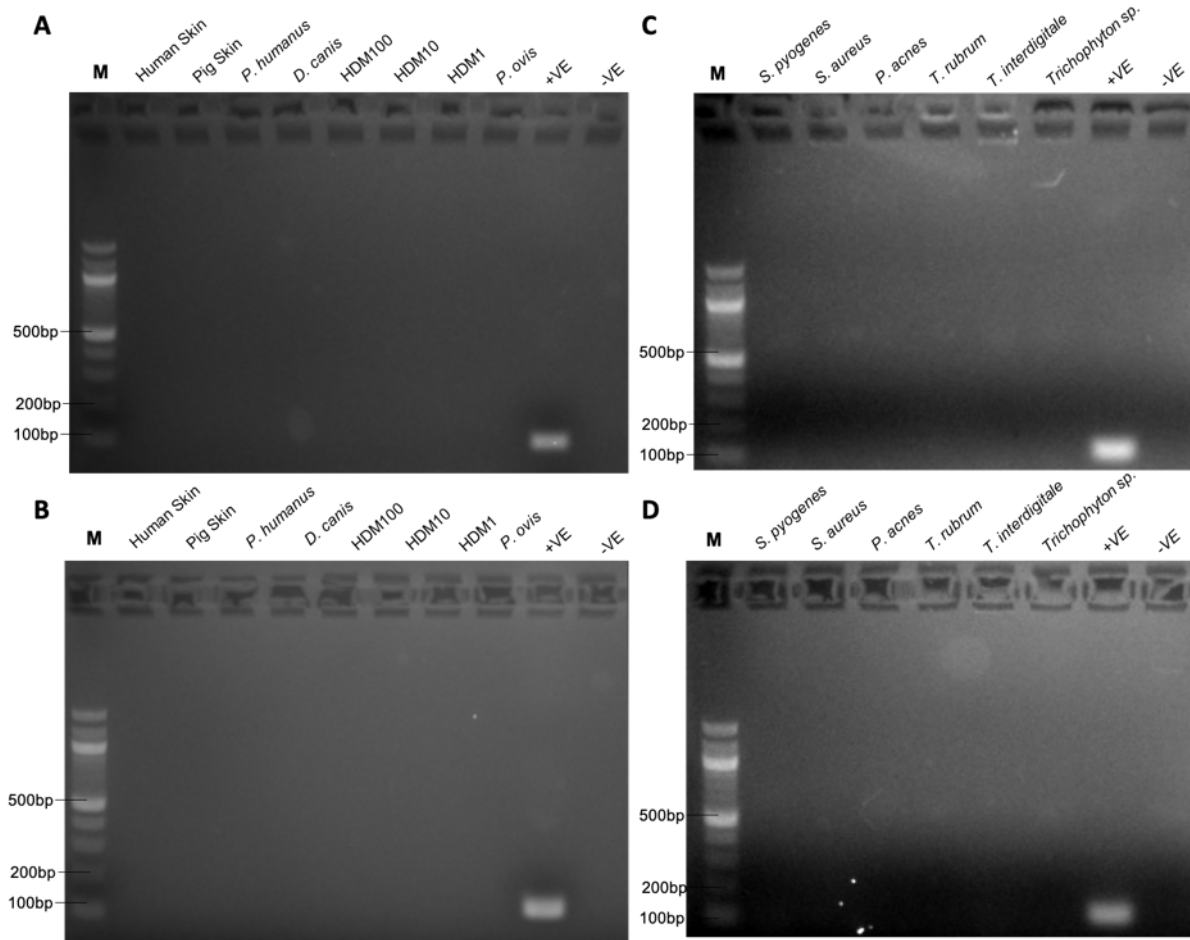

**S2 Fig. SSR5 and SSR6 Primer-Specificity.** Amplification (A) SSR5 and (B) SSR6 with gDNA panel consisting of human skin, pig skin, *P. humanus*, *D. canis*, *P. ovis* and serially-diluted HDMs. Neat, 1:10, 1:100 dilutions replicate presence of 100 (HDM100), ten (HDM10) and one (HDM1) HDM respectively. Amplification of (C) SSR5 and (D) SSR6 with gDNA of common skin pathogens including *S. pyogenes*, *S. aureus*, *P. acnes*, *T. rubrum*, *T. interdigitale* and *Trichophyton sp.* Negative control = water; Positive control = neat mite gDNA (n = 5).
