# Supplementary material for: Molecular diagnosis of scabies using a novel probe-based polymerase chain reaction assay targeting high-copy number repetitive sequences in the Sarcoptes scabiei genome
Source: PubMed Central journal article supplement (PMC7939366; doi:10.1371/journal.pntd.0009149), 2021-02-24
Supplement: pntd.0009149.s003.pdf [file pntd.0009149.s003.pdf]

**S1 Table. Summary of the 2018 IACS criteria for the diagnosis of scabies**

|                                                                                                                                                                                                                                                                                           |
|-------------------------------------------------------------------------------------------------------------------------------------------------------------------------------------------------------------------------------------------------------------------------------------------|
| <b><u>A: Confirmed Scabies</u></b>                                                                                                                                                                                                                                                        |
| At least one of:<br><ol style="list-style-type: none"><li>1. Mites, eggs or faeces on light microscopy of skin samples</li><li>2. Mites, eggs or faeces on visualized on individual using high-powered imaging device</li><li>3. Mite visualized on individual using dermoscopy</li></ol> |
| <b><u>B: Clinical Scabies</u></b>                                                                                                                                                                                                                                                         |
| At least one of:<br><ol style="list-style-type: none"><li>1. Scabies burrows</li><li>2. Typical lesions affecting male genitalia</li><li>3. Typical lesions in a typical distribution and two history features</li></ol>                                                                  |
| <b><u>C: Suspected Scabies</u></b>                                                                                                                                                                                                                                                        |
| One of:<br><ol style="list-style-type: none"><li>1. Typical lesions in a typical distribution and one history feature</li><li>2. Atypical lesions or atypical distribution and two history features</li></ol>                                                                             |
| <b><u>History features</u></b>                                                                                                                                                                                                                                                            |
| <ol style="list-style-type: none"><li>1. H1: Itch</li><li>2. H2: Close contact with an individual who has itch or typical lesions in a typical distribution</li></ol>                                                                                                                     |

*Notes:*

1. These criteria should be used in conjunction with the full explanatory notes and definitions (in preparation).
2. Diagnosis can be made at one of the three levels (A, B and C).
3. A diagnosis of Clinical and Suspected scabies should only be made if other differential diagnoses are considered less likely than scabies.
