# Supplementary material for: Molecular diagnosis of scabies using a novel probe-based polymerase chain reaction assay targeting high-copy number repetitive sequences in the Sarcoptes scabiei genome
Source: PubMed Central journal article supplement (PMC7939366; doi:10.1371/journal.pntd.0009149), 2021-02-24
Supplement: pntd.0009149.s004.pdf [file pntd.0009149.s004.pdf]

**S2 Table. Primer and probe details for qPCR assays**

| Name       | Function       | Target      | Sequence (5' - 3')                                 | Amplicon Size (bp) |
|------------|----------------|-------------|----------------------------------------------------|--------------------|
| WDeg_Cox1F | Forward primer | <i>cox1</i> | TGCTATRATTTCTATTGCAACYTTAGG                        | 121                |
| WDeg_Cox1R | Reverse primer | <i>cox1</i> | GGRACAGCRATAATTATAGTAGCTGAA                        |                    |
| WDeg_Cox1P | TaqMan probe   | <i>cox1</i> | FAM-TTTACTGTT/ZEN/GGATTAGATGTTGA<br>TACT/3IABkFQ   |                    |
| SSR5_F     | Forward Primer | SSR5        | GTCGAAGGTGGAGACAAAGATAG                            | 118                |
| SSR5_R     | Reverse Primer | SSR5        | CGGACTCTTCATCGATTGGTATC                            |                    |
| SSR5_P     | TaqMan Probe   | SSR5        | 56FAM-TCGTTGAGA/ZEN/TGAAGCGACCAGGA<br>GATG/3IABKFQ |                    |
| SSR6_F     | Forward Primer | SSR6        | TTGCTAGACCCTGATACCAAAC                             | 129                |
| SSR6_R     | Reverse Primer | SSR6        | ACCAGGAGTTGTTTGACACAATA                            |                    |
| SSR6_P     | TaqMan Probe   | SSR6        | 56FAM-<br>AATGCTCTT/ZEN/GCTAAGAGTGATGAT/3IABKFQ    |                    |

*6-FAM is 6-carboxyfluorescein fluorescent dye; 3IABkFQ is Iowa black quencher*
