# Supplementary material for: Molecular diagnosis of scabies using a novel probe-based polymerase chain reaction assay targeting high-copy number repetitive sequences in the Sarcoptes scabiei genome
Source: PubMed Central journal article supplement (PMC7939366; doi:10.1371/journal.pntd.0009149), 2021-02-24
Supplement: pntd.0009149.s005.pdf [file pntd.0009149.s005.pdf]

**S3 Table. RepeatExplorer2 identified repetitive DNA elements with at least one high confidence call amongst four Illumina generated mite sequences**

| Cluster                 | Consensus Sequence                                                                                                                                                                                                                                                                                                                                                                                                                                                                                                                                                                                                                                                                                                                                                                                                                      | Probability Confidence Score (Genome Proportion Score) |                   |                   |                   |
|-------------------------|-----------------------------------------------------------------------------------------------------------------------------------------------------------------------------------------------------------------------------------------------------------------------------------------------------------------------------------------------------------------------------------------------------------------------------------------------------------------------------------------------------------------------------------------------------------------------------------------------------------------------------------------------------------------------------------------------------------------------------------------------------------------------------------------------------------------------------------------|--------------------------------------------------------|-------------------|-------------------|-------------------|
|                         |                                                                                                                                                                                                                                                                                                                                                                                                                                                                                                                                                                                                                                                                                                                                                                                                                                         | Human 1                                                | Human 2           | Pig 1             | Pig 2             |
| 606bp<br>LTR<br>(SSR6)  | <p>ATTGGTGACTATGAGAAGCCTAGAAA<br/> GACTGGTGAAACAATAACAAAATG<br/> AGAGATCCAACCTGGTAAAACCTGTGAC<br/> AAGGATTGTGAAACGAAAACCTGATG<br/> GCACTGAAACTGTTGAAGAGCATATT<br/> GAAGAACGTAAATCCGTTCCAAGATC<br/> ATTGAGCAGAGACGATAAACCTGAGC<br/> AGTCGAAAATATTCGATGCCAAAAAA<br/> CCGAGAAAGATCGTCAGAATCATTCT<br/> GAAGAAACCCAATGGTGATGAATCA<br/> GTTGAAGAGCTATTGCTAGACCCTGA<br/> <u>TACCAAAC</u><sup>1</sup>AGGAAGATATCGATAAA<br/> GTGTTGAAAGACGAGATACAGAATGC<br/> <u>TCTTGCTAAGAGTGATGAT</u><sup>2</sup>CCGGATG<br/> CTAAGATAATTGCCAATATTGTGTCA<br/> <u>ACAACTCCTGGT</u><sup>3</sup>GTAGAAGAGACGG<br/> TTGAAGAATTTCGAGACGGATCCTCAA<br/> ACTGTGAAAAAGAATATTGATGATGT<br/> ACTGAAAAAAGCTCCAAGGACCAAA<br/> ACCTCGAGAAAGAAAGATCCTCTCGG<br/> TAAAATTGTTACTAAGGTATTTAAAC<br/> GCAAACCTGATGGCAAAGAAACAGTT<br/> GAAGAGAAAGTCGAAGATCCTCAAG<br/> TGACCGGAAAG</p> | 0.889<br>(0.018%)                                      | 0.976<br>(0.021%) | 0.959<br>(0.027%) | 0.933<br>(0.023%) |
| 201bp<br>Microsatellite | <p>TCGTAACCTGATATCGAACTGGCAAA<br/> AAGAAAATTGTGAAGAAGAAGAAAC<br/> CGAAACAAGGTGTAGATGCAGAAAC<br/> ACCTATTGAACAAGAAACAAAAGCA<br/> AAAGATGAATCTAAACCAGATGAGTC<br/> TGTGCCTGAGATCAGTGAGGTGGTTC<br/> CTGAATCACTCGACAAAGATGAAACT<br/> AGAGAGGAATTCATCACTGAAG</p>                                                                                                                                                                                                                                                                                                                                                                                                                                                                                                                                                                              | 0.986<br>(0.057%)                                      | 0.994<br>(0.073%) | 0.979<br>(0.086%) | 0.994<br>(0.086%) |
| 93bp<br>Microsatellite  | <p>TACACTTGCTCCTGTTGGTGCAACTG<br/> GTCCAACCTGAGAAAGAACCATTCA<br/> ACTGAATATCCATCGACTTCGACAAT<br/> CTCAGACAAAGATAGAACCACTTATG<br/> AACCTGGAACCAG</p>                                                                                                                                                                                                                                                                                                                                                                                                                                                                                                                                                                                                                                                                                     | 0.994<br>(0.026%)                                      | 0.993<br>(0.032%) | 0.979<br>(0.039%) | 0.965<br>(0.037%) |

|                                |                                                                                                                                                                                                                                                                                                                                                                                                                                                                                     |                   |                   |                   |                   |
|--------------------------------|-------------------------------------------------------------------------------------------------------------------------------------------------------------------------------------------------------------------------------------------------------------------------------------------------------------------------------------------------------------------------------------------------------------------------------------------------------------------------------------|-------------------|-------------------|-------------------|-------------------|
| 375bp<br>Microsatellite (SSR5) | GTTGGTTTCTCCATTCCACCATCGATT<br>GGTTTTTCGGACTCTTCATCGATTGGT<br>ATC <sup>1</sup> TTGCGATCTTCATCTCCTGGTCTG<br>CTTCATCTCAACGA <sup>2</sup> TTTCCTCACTAA<br>TCTCAGTAGTCACAGATTCAGTTCTAT<br>CTTTGTCTCCACCTTCGAC <sup>3</sup> CAGTGTT<br>GGTTTCGAATCTTTGCGTTTGGTCAAT<br>TTACTTTTCTCTTAGTTTCAATTCG<br>ACTGTTGATTCTGTTTTAGGAACTTCT<br>TCTTGTCTTCTGGAGCGATAGATTCT<br>CTTCGCTTGAGATCTATAGAGTCTTCA<br>GTGATTTGCTTTTCTTCTTCAACTGGT<br>TTCTTATGAGAATCTTTTCGTTTGATT<br>TTTCTAGGTTTCTTCGTTTCTTCATCA | 0.767<br>(0.024%) | 0.853<br>(0.034%) | N/A               | 0.928<br>(0.044%) |
| 117bp<br>Microsatellite        | TACACTTGCTCCTGTTGGTGCAACTG<br>GTCCAAGTGAAGAAAGAACCATTCACA<br>ACTGAATATCCATCGACTTCGACAAT<br>CTCAGACAAAGATAGAACCACTTATG<br>AACCTGGAACCAG                                                                                                                                                                                                                                                                                                                                              | 0.986<br>(0.057%) | 0.981<br>(0.018%) | 0.994<br>(0.023%) | 0.986<br>(0.030%) |
| 333bp<br>Microsatellite        | TTTCGCCTTCCACTTTGGGAATATCAA<br>CATCAACATCTACTTCAGGACCAGAC<br>ACTTTTGGTCCTTTGAACCCAAATTTA<br>GGCATAGAGAACTCCCAATCTTTTCC<br>ATCTTTCTCTTTCGATTTTTTGTCCTTC<br>TTCTTCTTCAGAGATAGATTCACATCA<br>CCTTCAACCTTCGGTAATTCTACATCT<br>GGCATATCAACTTCAGCCTTTCCTAA<br>ATCTACATCTGGTCCGCTTATTTTCGG<br>ACCTTTGAAACCGAATTTGGGCATAT<br>GTAATCCCCATCCTTTGCCATCTTTGT<br>CTCCCATATCTGGTGATTTTCTATCTA<br>AACTCAGATCGA                                                                                       | 0.955<br>(0.013%) | 0.981<br>(0.013%) | 0.959<br>(0.018%) | 0.985<br>(0.018%) |
| 40bp<br>Microsatellite         | GGCAAAGAAGCTCCAACCAAGCCTG<br>ATGACAAGAAAGAACCA                                                                                                                                                                                                                                                                                                                                                                                                                                      | 0.487<br>(0.026%) | 0.781<br>(0.012%) | 0.056<br>(0.094%) | 0.908<br>(0.026%) |
| 315bp<br>Microsatellite        | TTACAAGAATTGCAAGATGTTGTAGT<br>GTCAAAAGGTCAACCTGTAGCAAAAC<br>TTGAAGCACAAATTGCTGGAAATCCG<br>AAACCAAAGGTCGAATGGTTCAAAG<br>ATAATCAAAAACCTGAAGAATCGCCA<br>CATTGGAAGATGGTCAGCGATGGCAA<br>AGACAAATACTCATTGACTATTCAA<br>ACGTGAATAGTGAAGACGTTGGACAA<br>TACAAAATTCTGGCCACCAATGATCT<br>TGGTAAAACCTGAATCAAAGGCCAAAT<br>TATCAATCGGTGATGGATCAAACCA<br>GATGATGCAAAGAAACACTCTCCTGA<br>AATT                                                                                                          | N/A               | N/A               | 0.959<br>(0.010%) | 0.976<br>(0.014%) |

|                         |                                                                                                                                                                                                                                                                                                                                                                                                 |     |     |                   |                   |
|-------------------------|-------------------------------------------------------------------------------------------------------------------------------------------------------------------------------------------------------------------------------------------------------------------------------------------------------------------------------------------------------------------------------------------------|-----|-----|-------------------|-------------------|
| 75bp<br>Microsatellite  | GATGGTTGCAATGATGATGTCGGAAC<br>ACCAGCCAAAGCGCTAGGATCTCTTG<br>CTGATGGTTCTCTGCCTAATTCT                                                                                                                                                                                                                                                                                                             | N/A | N/A | 0.644<br>(0.013%) | 0.915<br>(0.014%) |
| 336bp<br>Microsatellite | GGTGGGTCCCTCCCTAGCTGGCGAAG<br>GGTGGGGTGGTGGGGCCAGTGCACAC<br>AAGGCCTTTTCAGGCCCATCCGCCT<br>TCTCCCTGAAGTAGAGCACGTTTGGA<br>GTTGGTTTCCAGCTCCAGCGACGACC<br>TGCAAAGCACCAGTGCACAGGGAGC<br>AGGAGGCAGCCCAGAACCTCCTTGTT<br>CCTATGGCGAGCAATGGGCTAGGGGA<br>GAAACCAGAAAGCGCTGCTTTCCTGA<br>GCAAACACGCATTGGGGCTGAGCTTG<br>GTTTCCCGAGGAGAGTTTCACTTTCG<br>CGAATGCAGCTCCCAGAAGCTAGTTT<br>TGTGCCTTTTCTGAGATGGGCCCTA | N/A | N/A | 0.868<br>(0.050%) | 0.071<br>(0.026%) |
| 84bp<br>Microsatellite  | GAGCTTCTTTGCCTGGTTCTTTCTTGT<br>CTTCAGGCTTGGTTGGAGCATCTTTGC<br>CTGGTTCTTTCTTGTTCATCAGGCTTGG<br>TTG                                                                                                                                                                                                                                                                                               | N/A | N/A | 0.819<br>(0.024%) | N/A               |

*N/A - not available*

<sup>1</sup>Forward primer binding site

<sup>2</sup>Probe binding site

<sup>3</sup>Reverse primer binding site
