# Supplementary material for: Molecular diagnosis of scabies using a novel probe-based polymerase chain reaction assay targeting high-copy number repetitive sequences in the Sarcoptes scabiei genome
Source: PubMed Central journal article supplement (PMC7939366; doi:10.1371/journal.pntd.0009149), 2021-02-24
Supplement: pntd.0009149.s006.pdf [file pntd.0009149.s006.pdf]

**S4 Table. qPCR results for the two-fold dilution series used to determine the assays limit of detection\***

| <b>Target</b> | <b>Dilution (copies/<math>\mu</math>L)</b> | <b>Cycle quantification (Cq) values</b> |       |       |       |       |       | <b>% Positive</b> |
|---------------|--------------------------------------------|-----------------------------------------|-------|-------|-------|-------|-------|-------------------|
| <b>SSR5</b>   | <u>30</u>                                  | 31.39                                   | 32.33 | 31.73 | 31.99 | 31.84 | 32.01 | <b>100</b>        |
|               | <u>15</u>                                  | 32.88                                   | 32.60 | 32.85 | 32.86 | 33.6  | 32.83 | <b>100</b>        |
|               | <u>7.5</u>                                 | 33.13                                   | 33.98 | 33.62 | 33.89 | 35.51 | 33.15 | <b>100</b>        |
|               | <u>3.75</u>                                | 34.42                                   | 35.76 | 36.65 | 34.11 | 35.89 | 35.74 | <b>100</b>        |
|               | <u>1.875</u>                               | N/A                                     | 36.23 | 35.96 | N/A   | N/A   | N/A   | <b>33.3</b>       |
|               | <u>0.9375</u>                              | 36                                      | 37.75 | 36.74 | 34.68 | N/A   | N/A   | <b>66.7</b>       |
| <b>SSR6</b>   | <u>30</u>                                  | 31.25                                   | 30.80 | 30.93 | 30.82 | 30.72 | 31.35 | <b>100</b>        |
|               | <u>15</u>                                  | 32.16                                   | 31.47 | 32.26 | 31.8  | 31.44 | 32.04 | <b>100</b>        |
|               | <u>7.5</u>                                 | 34.41                                   | 32.68 | 34.21 | 36.19 | 32.47 | 33.56 | <b>100</b>        |
|               | <u>3.75</u>                                | 32.77                                   | 33.54 | 34.12 | 34.73 | 34.04 | 35.73 | <b>100</b>        |
|               | <u>1.875</u>                               | 35.89                                   | 35.6  | 36.67 | 36.67 | 36.16 | 34.15 | <b>100</b>        |
|               | <u>0.9375</u>                              | 36.48                                   | N/A   | 36.84 | N/A   | N/A   | 37.33 | <b>50</b>         |
| <b>cox1</b>   | <u>30</u>                                  | 31.73                                   | 31.65 | 31.71 | 32.11 | 31.85 | 31.74 | <b>100</b>        |
|               | <u>15</u>                                  | 33.42                                   | 33.01 | 32.81 | 33.12 | 33.67 | 33.34 | <b>100</b>        |
|               | <u>7.5</u>                                 | 34.54                                   | 35.81 | 33.64 | 33.59 | 33.24 | 33.4  | <b>100</b>        |
|               | <u>3.75</u>                                | 36.09                                   | 34.58 | 35.94 | 33.71 | 33.92 | 35.86 | <b>100</b>        |
|               | <u>1.875</u>                               | N/A                                     | N/A   | 37.89 | 36.3  | N/A   | NA    | <b>33.3</b>       |
|               | <u>0.9375</u>                              | N/A                                     | 35.97 | 38.51 | 37.87 | 36.37 | N/A   | <b>66.7</b>       |

*\*Two dilution series were prepared, and triplicates of each dilution were analysed with qPCR.*

*\*\* Positive is determined by any reaction reporting a Cq value.*

*N/A - not available*
