# Supplementary material for: Molecular diagnosis of scabies using a novel probe-based polymerase chain reaction assay targeting high-copy number repetitive sequences in the Sarcoptes scabiei genome
Source: PubMed Central journal article supplement (PMC7939366; doi:10.1371/journal.pntd.0009149), 2021-02-24
Supplement: pntd.0009149.s007.pdf [file pntd.0009149.s007.pdf]

**S5 Table. Triplicate cycle quantification (Cq) values for mite extractions to determine assay sensitivity**

*\*Cq – cycle quantification*

| No. of mites per reaction  | Cq values of the developed qPCR assays* |       |       |       |       |       | Cq values of the reference qPCR assay* |       |       |
|----------------------------|-----------------------------------------|-------|-------|-------|-------|-------|----------------------------------------|-------|-------|
|                            | SSR5                                    |       |       | SSR6  |       |       | <i>cox1</i>                            |       |       |
| 1                          | 24.04                                   | 24.01 | 24.29 | 26.43 | 26.69 | 26.47 | 24.63                                  | 24.78 | 24.65 |
| 0.1<br>(dilution 1:10)     | 27.99                                   | 28.05 | 27.75 | 29.42 | 29.72 | 29.77 | 28.75                                  | 28.92 | 28.8  |
| 0.01<br>(dilution 1:100)   | 30.26                                   | 32.29 | 32.08 | 32.53 | 32.51 | 32.23 | 32.49                                  | 31.55 | 32.21 |
| 0.001<br>(dilution 1:1000) | N/A                                     | N/A   | N/A   | N/A   | N/A   | N/A   | N/A                                    | N/A   | N/A   |

*\*\*SSR5, SSR6 and cox1 are the genes targeted in the assays*

*N/A - not available*
