# Supplementary material for: Molecular diagnosis of scabies using a novel probe-based polymerase chain reaction assay targeting high-copy number repetitive sequences in the Sarcoptes scabiei genome
Source: PubMed Central journal article supplement (PMC7939366; doi:10.1371/journal.pntd.0009149), 2021-02-24
Supplement: pntd.0009149.s008.pdf [file pntd.0009149.s008.pdf]

**S6 Table. Profile of school children from StoP Trial in Kimberley, WA enrolled in this study.**

| <b>Individual No.</b> | <b>Age</b> | <b>Indigenous?</b> | <b>Patient Diagnosis</b> | <b>Sample Type</b> | <b>Treatment</b> | <b>Sample Source</b> |
|-----------------------|------------|--------------------|--------------------------|--------------------|------------------|----------------------|
| 1                     | 13         | Yes                | Suspected scabies        | FLOQ swab          | No               | Kimberley, WA        |
| 2                     | 10         | Yes                | Suspected scabies        | FLOQ swab          | No               | Kimberley, WA        |
| 3                     | 10         | Yes                | Suspected scabies        | FLOQ swab          | No               | Kimberley, WA        |
| 4                     | 8          | Yes                | Suspected scabies        | FLOQ swab          | No               | Kimberley, WA        |
| 5                     | 10         | Yes                | Suspected scabies        | FLOQ swab          | No               | Kimberley, WA        |
| 6                     | 6          | Yes                | Suspected scabies        | FLOQ swab          | No               | Kimberley, WA        |
| 7                     | 7          | Yes                | Suspected scabies        | FLOQ swab          | No               | Kimberley, WA        |
| 8                     | 9          | Yes                | Suspected scabies        | FLOQ swab          | No               | Kimberley, WA        |
| 9                     | 7          | Yes                | Suspected scabies        | FLOQ swab          | No               | Kimberley, WA        |
| 10                    | 5          | Yes                | Suspected scabies        | FLOQ swab          | No               | Kimberley, WA        |
| 11                    | 5          | Yes                | Suspected scabies        | FLOQ swab          | No               | Kimberley, WA        |
| 12                    | 8          | Yes                | Suspected scabies        | FLOQ swab          | No               | Kimberley, WA        |
| 13                    | 7          | Yes                | Suspected scabies        | FLOQ swab          | No               | Kimberley, WA        |
| 14                    | 5          | Yes                | Suspected scabies        | FLOQ swab          | No               | Kimberley, WA        |
| 15                    | 6          | Yes                | Suspected scabies        | FLOQ swab          | No               | Kimberley, WA        |
| 16                    | 9          | Yes                | Suspected scabies        | FLOQ swab          | No               | Kimberley, WA        |
