# Supplementary material for: Molecular diagnosis of scabies using a novel probe-based polymerase chain reaction assay targeting high-copy number repetitive sequences in the Sarcoptes scabiei genome
Source: PubMed Central journal article supplement (PMC7939366; doi:10.1371/journal.pntd.0009149), 2021-02-24
Supplement: pntd.0009149.s009.pdf [file pntd.0009149.s009.pdf]

**S7 Table. Diagnostic results of StoP Trial samples by qPCR**

---

|                            | <b>Suspected scabies (n = 15)</b> | <b>No scabies (n = 0)</b> |
|----------------------------|-----------------------------------|---------------------------|
| <b>Clinical Assessment</b> | 15                                | 0                         |
| <b>qPCR (SSR5)</b>         | 1                                 | 14                        |
| <b>qPCR (<i>cox1</i>)</b>  | 2                                 | 13                        |

---
